# Supplementary material for: Bisphenol A Impairs Synaptic Plasticity by Both Pre‐ and Postsynaptic Mechanisms
Source: PubMed Central journal article supplement (PMC5566242; doi:10.1002/advs.201600493), 2017-04-19
Supplement: ADVS-4-na-s001.pdf [file ADVS-4-na-s001.pdf]

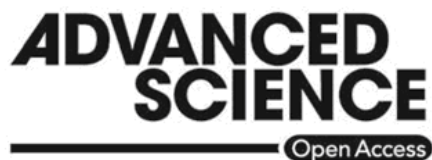

## Supporting Information

for *Adv. Sci.*, DOI: 10.1002/advs.201600493

**Bisphenol A Impairs Synaptic Plasticity by Both Pre- and Postsynaptic Mechanisms**

*Fan Hu,\* Tingting Li, Huarui Gong, Zhi Chen, Yan Jin, Guangwei Xu, and Ming Wang\**

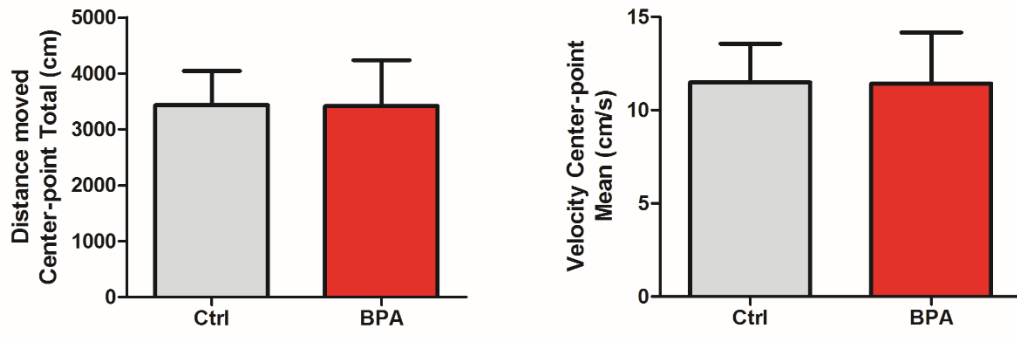

Juvenile BPA exposure had no effect on the locomotion (moving distance and velocity) of rats in open field test.
